# Supplementary material for: The big potential of the small frog Eleutherodactylus coqui
Source: eLife journal article supplement (doi:10.7554/elife.73401), 2022-01-14
Supplement: supp [file elife-73401-supp-v1.zip]

Archive with 2 entries (2 files):
- elife_poa_e73401_Video_1.mov
- elife_poa_e73401_Transparent_Reporting_File.pdf
